# Supplementary material
Source: HighWire-hosted journal article supplement (https://bjsm.bmj.com/content/55/18/1048)

Persisting Internalising Problems (3-12 months)

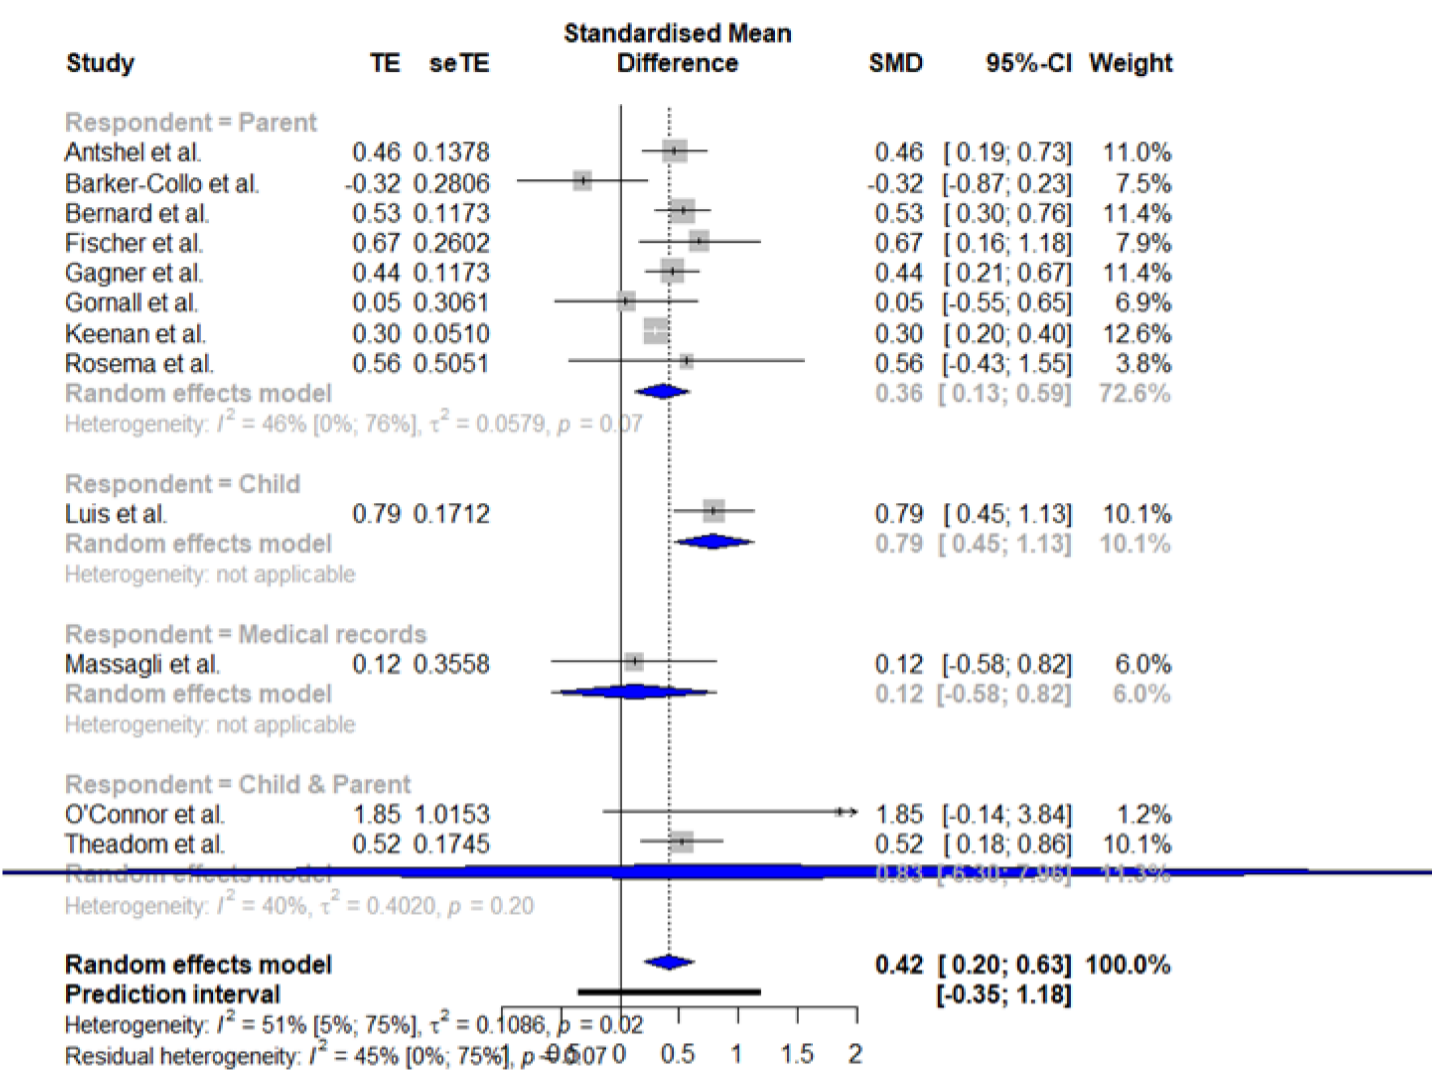

Chronic Internalising Problems (>12 months)

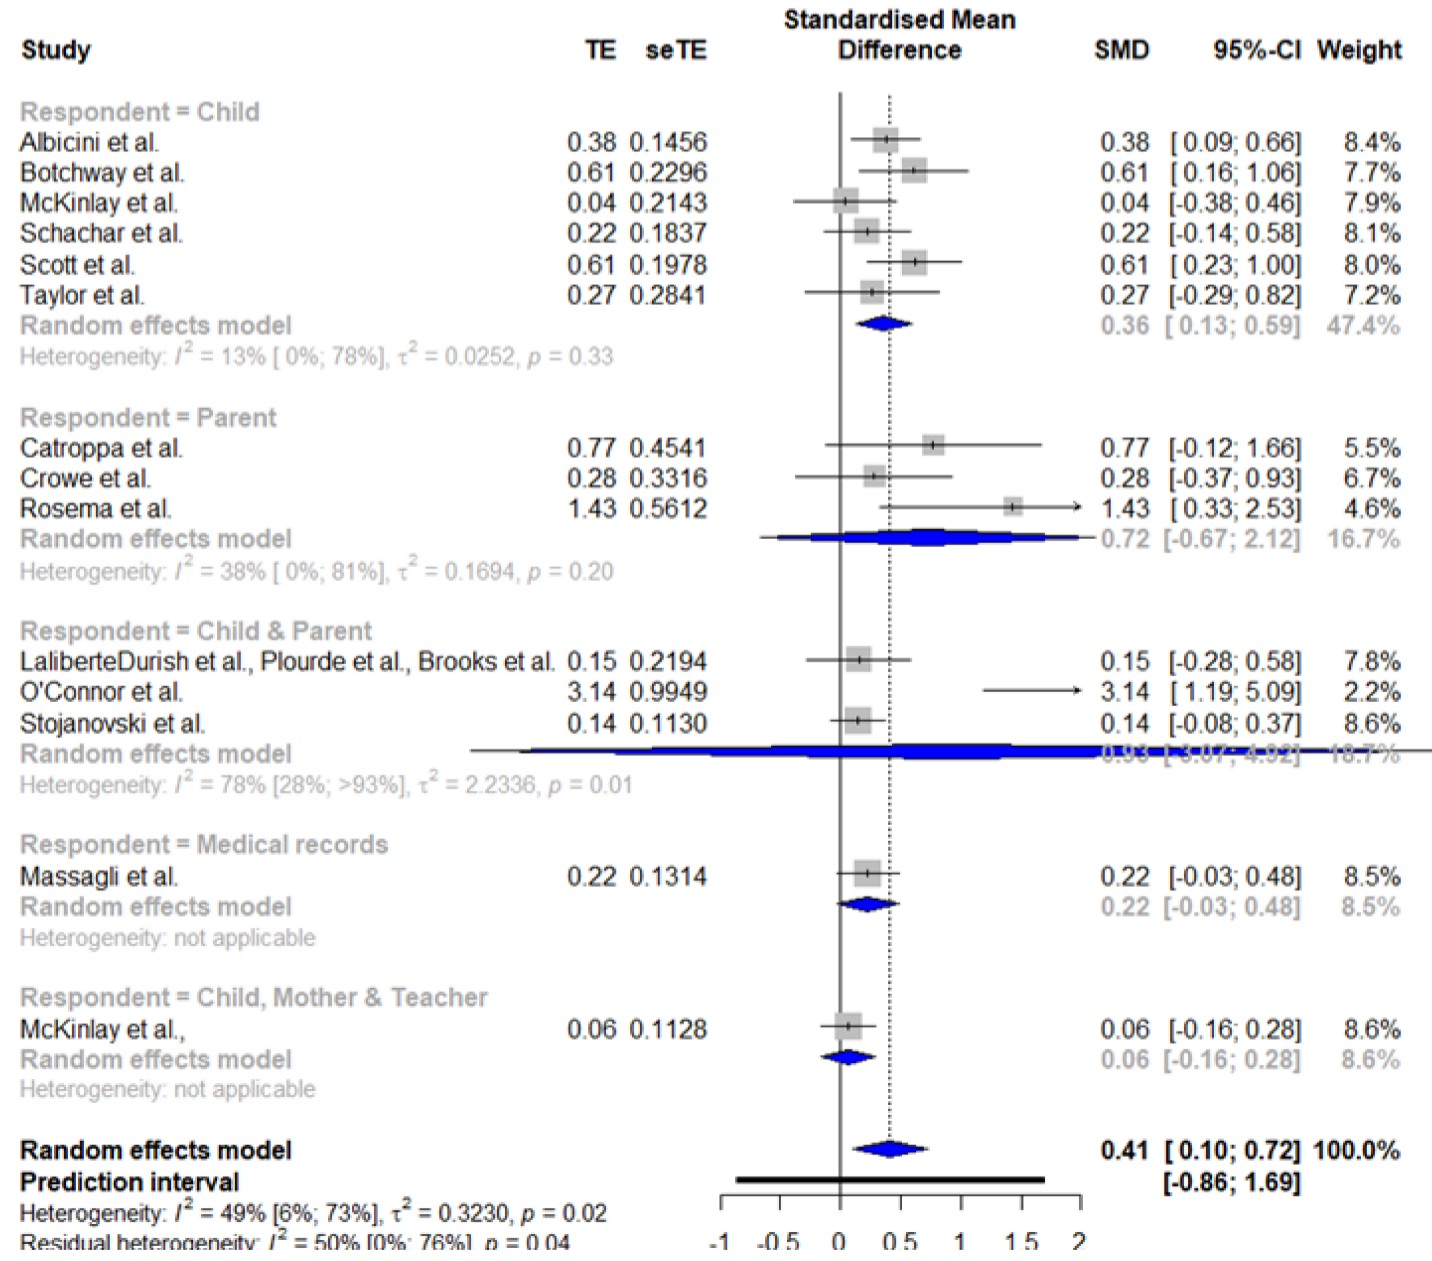

Supplement: inline-supplementary-material-7 [file inline-supplementary-material-7.pdf]
